# Supplementary material
Source: PubMed Central journal article supplement (PMC5974929)

## Treff et al., Supplemental Figure Legends

**Supplemental Figure S1. Threshold copy number determination for euploid and aneuploid chromosomes.** Box plots representing the distribution of data for monosomy, disomy, and trisomy from samples with confirmed aneuploidy. Data was used to define cutoff values for application to unknown samples.

**Supplemental Figure S2. Metaphase II oocytes can be obtained from reproductively aged mice for sequencing analysis.** **A)** A representative image of prophase I-arrested oocytes collected from antral follicles from reproductively aged mice, clearly showing the germinal vesicle. **B)** A representative image of mature metaphase II oocytes obtained following in vitro maturation (asterisks highlights the polar body). **C)** Meiotic progression of oocytes isolated from each reproductively old mouse (A-H) following in vitro maturation. White bars represent cells that remained arrested in prophase I as evidenced by an intact germinal vesicle (GV); gray bars represent cells that resumed meiosis but did not reach metaphase II (MII) as evidenced by loss of the GV but lack of polar body extrusion (germinal vesicle breakdown; GVBD/metaphase of meiosis I; MI); black bars represent cells that reached metaphase II as evidenced by polar body extrusion, and lined bars represent cells that were degenerate.

**Supplemental Figure S3. Examples of chaotic sequencing results.** Representative sequencing plots of chaotic reads obtained from an individual oocyte (**A**) and polar body (**B**). These chaotic reads were observed infrequently and only in the oocyte and polar body samples (Table 1).

# Treff et al. Supplemental Figure S1

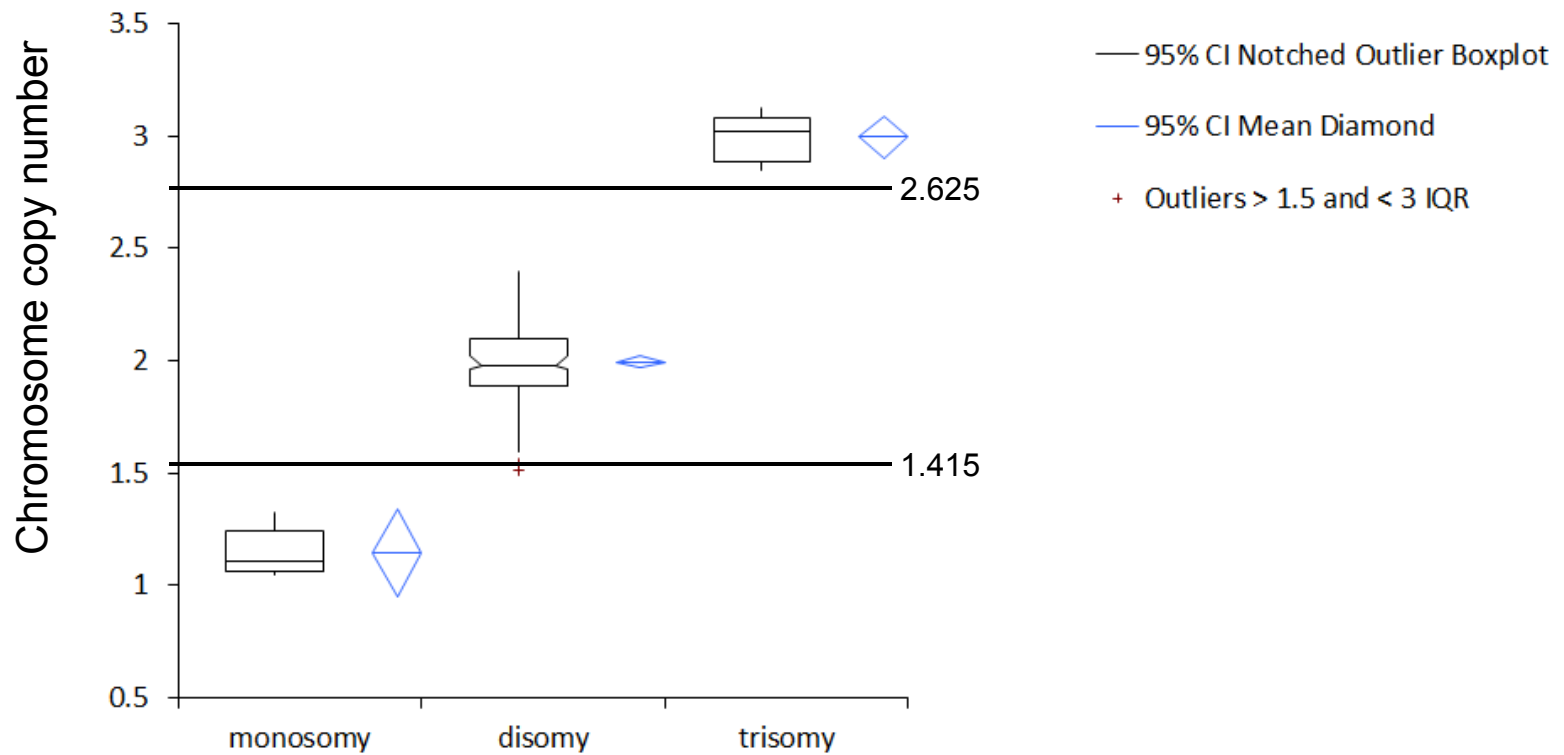

## Treff et al., Supplemental Figure S2

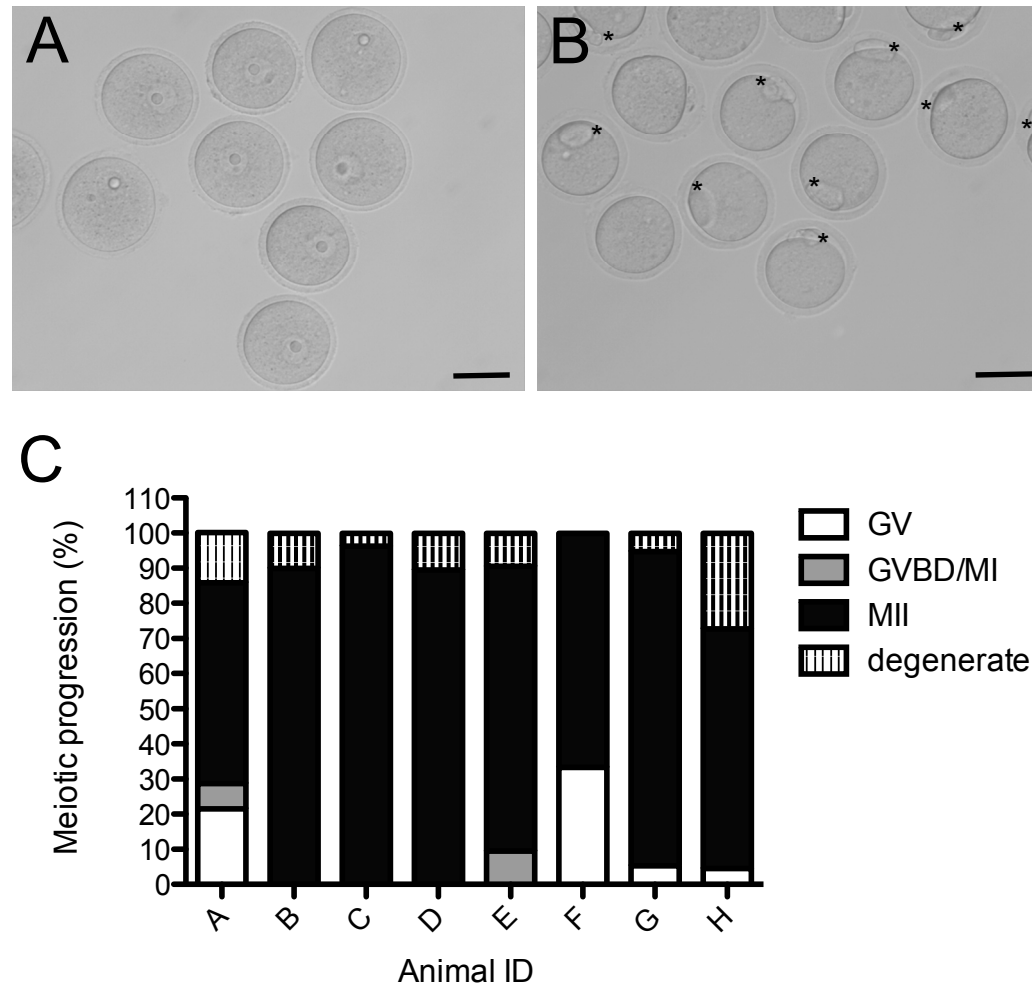

# Treff et al., Supplemental Figure S3

A

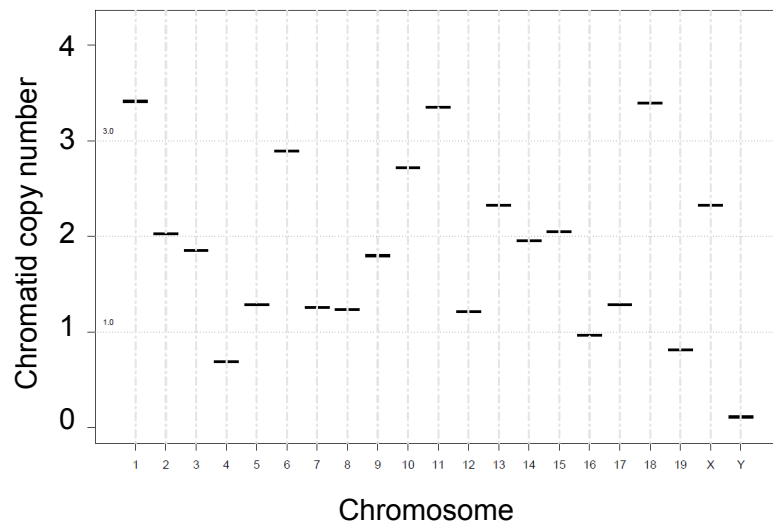

B

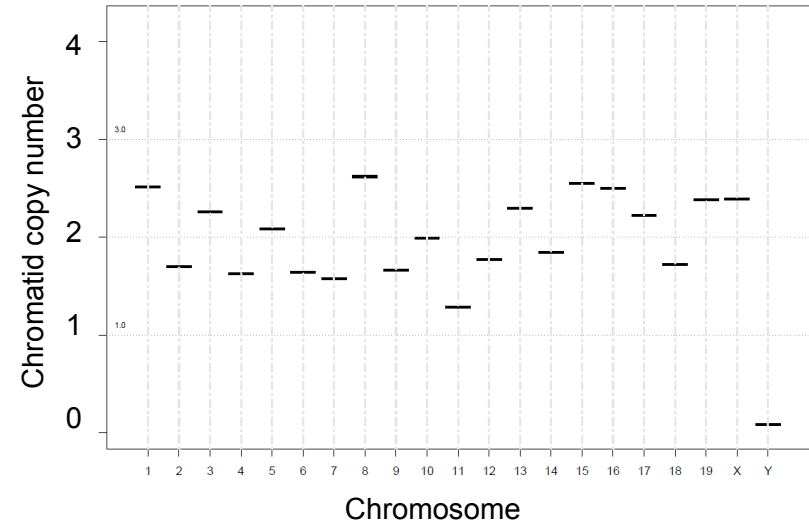

Supplement: biolreprod.115.135483-1.pdf [file biolreprod.115.135483-1.pdf]
